# Supplementary material
Source: Springer Nature journal article supplement (http://www.springermedizin.de/resource/supplementary/12887_2011_581_MOESM2_ESM.pdf/9475702)

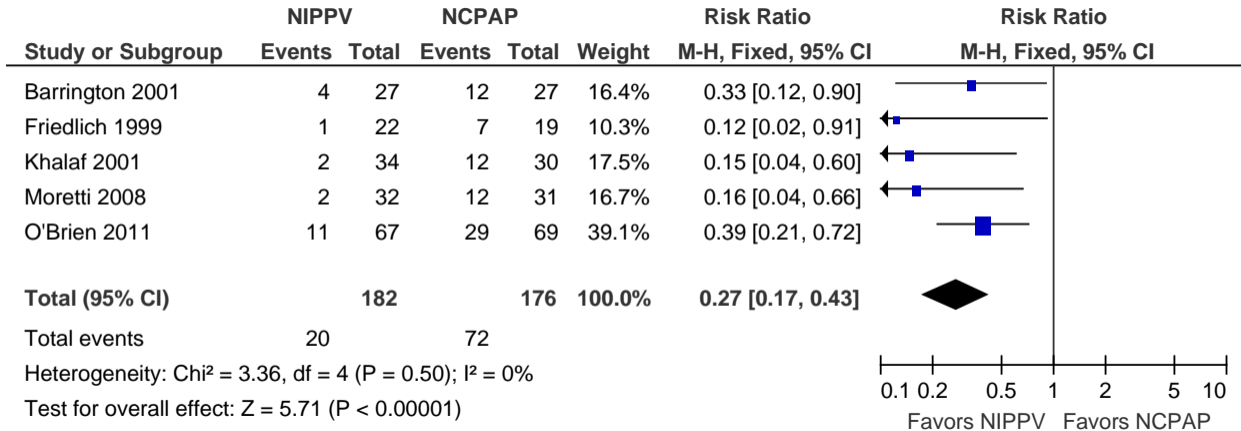

Supplement: MOESM2 [file 9475702]
